# Supplementary material for: Long-Term Antibody Response against SARS-CoV-2 in Health Care Workers: Effectiveness of Homologous and Heterologous Regimens and Their Relation to Systemic Vaccine-Associated Symptoms
Source: MDPI journal article supplement (doi:10.3390/vaccines10101599), 2022-09-23
Supplement: s1 [file s1]

**Table S1.** Online Questionnaire

| No. | Question                                                       | Answer                        | Sub-answer                |
|-----|----------------------------------------------------------------|-------------------------------|---------------------------|
| 1a  | Have you previously tested positive for SARS-CoV-2?            | Yes/no                        | If yes, date (yyyy-mm-dd) |
| 2a  | What vaccine did you get?                                      | Comirnaty® (Pfizer)           |                           |
|     |                                                                | COVID-19 vaccine Moderna®     |                           |
|     |                                                                | COVID-19 vaccine AstraZeneca® |                           |
|     |                                                                | Do not know                   |                           |
|     |                                                                | Do not wish to tell           |                           |
| 2b  | Date of 1 <sup>st</sup> vaccine dose                           | yyyy-mm-dd                    |                           |
| 2c  | Date of 2 <sup>nd</sup> vaccine dose                           | yyyy-mm-dd                    |                           |
| 3   | Vaccine-associated symptoms after 1 <sup>st</sup> vaccine dose |                               |                           |
| 3a  | Headache*                                                      | Yes/no                        | If yes, duration in days  |
| 3b  | Muscle pain*                                                   | Yes/no                        | If yes, duration in days  |
| 3c  | Feeling of fever / chills*                                     | Yes/no                        | If yes, duration in days  |
| 3d  | Nausea*                                                        | Yes/no                        | If yes, duration in days  |
| 3e  | Fatigue*                                                       | Yes/no                        | If yes, duration in days  |
| 3f  | Dizziness*                                                     | Yes/no                        | If yes, duration in days  |
| 3g  | Sore arm                                                       | Yes/no                        | If yes, duration in days  |
| 3h  | Other                                                          | Yes/no                        | If yes, describe          |
| 4   | Vaccine-associated symptoms after 2 <sup>nd</sup> vaccine dose |                               |                           |
| 4a  | Headache*                                                      | Yes/no                        | If yes, duration in days  |
| 4b  | Muscle pain*                                                   | Yes/no                        | If yes, duration in days  |
| 4c  | Feeling of fever / chills*                                     | Yes/no                        | If yes, duration in days  |
| 4d  | Nausea*                                                        | Yes/no                        | If yes, duration in days  |
| 4e  | Fatigue*                                                       | Yes/no                        | If yes, duration in days  |
| 4f  | Dizziness*                                                     | Yes/no                        | If yes, duration in days  |
| 4g  | Sore arm                                                       | Yes/no                        | If yes, duration in days  |
| 4h  | Other                                                          | Yes/no                        | If yes, describe          |
| 5   | Do you have a chronic illness?                                 | Yes/no                        | If yes, describe          |
| 6   | May we contact you for further research?                       | Yes/no                        |                           |

\* Vaccine-associated symptoms marked with a star were grouped as systemic. Sub-answers were only shown if the answer before was “yes”.
